# Supplementary material
Source: publisher figshare collection journal article supplement (https://asha.figshare.com/articles/dataset/_/6170303)
Supplement: Supplementary file 1 [file 1]

**Supplemental Table 2.** Exploratory factor analysis structure coefficients<sup>a</sup> of 12 language measures with oblimin rotation for the one-, two-, and three-factor solutions.

| Measure                    | One-factor | Two-factor |      | Three-factor |       |
|----------------------------|------------|------------|------|--------------|-------|
| CWS                        | .726       | .746       |      | .799         | –.489 |
| SMT                        | .774       | .809       |      | .832         | –.577 |
| IBK                        | .796       | .797       | .435 | .741         | –.719 |
| IINT                       | .761       | .764       | .405 | .709         | –.694 |
| CUSP                       | .739       | .740       | .402 | .710         | –.619 |
| CRS                        | .759       | .781       |      | .829         | –.524 |
| ANC                        | .875       | .874       | .488 | .818         | .449  |
| ROW                        | .524       | .490       | .474 |              | .420  |
| EOW                        | .645       | .619       | .494 | .491         | .412  |
| CWCE                       | .538       | .479       | .752 | .424         | .786  |
| CWCR                       | .405       |            | .756 |              | .782  |
| CMKV                       | .624       | .606       | .434 | .525         | .378  |
| <b>Factor Correlations</b> |            |            |      |              |       |
| Factor 1 with Factor 2     |            | .507       |      | .406         |       |
| Factor 1 with Factor 3     |            |            |      | –.664        |       |
| Factor 2 with Factor 3     |            |            |      | –.500        |       |

*Note.* CWS = Clinical Evaluation of Language Fundamentals Preschool Second Edition–Spanish: Word Structure Subtest (Wiig, Secord, & Semel, 2009); SMT = Spanish Screener for Language Impairment in Children: Morphology (SSLIC; Restrepo, Gorin, & Gray, 2013); IBK = Inference Task: Background Knowledge; IINT = Inference Task: Integration; CUSP = Clinical Evaluation of Language Fundamentals Fourth Edition–Spanish: Understanding Spoken Paragraphs Subtest (adapted; Wiig, Secord, & Semel, 2006); CRS = Clinical Evaluation of Language Fundamentals Preschool Second Edition–Spanish: Recalling Sentences Subtest (Wiig, Secord, & Semel, 2009); ANC = Assessment of Narrative Language Comprehension; ROW = Receptive One-Word Picture Vocabulary Test–Spanish Bilingual Edition; EOW = Expressive One-Word Picture Vocabulary Test–Spanish Bilingual Edition; CWCE = Clinical Evaluation of Language Fundamentals Preschool Second Edition–Spanish: Word Classes Subtest Expressive Score Subtest (Wiig, Secord, & Semel, 2009); CWCR = Clinical Evaluation of Language Fundamentals Preschool Second Edition–Spanish: Word Classes Subtest Receptive Score Subtest (Wiig, Secord, & Semel, 2009); CMKV = Comprehension Monitoring–Prior Knowledge Violations–Spanish.

<sup>a</sup>Loadings  $\leq .40$  not shown.
